# Supplementary material for: Luminance efficiency roll-off mechanism in CsPbBr3−xClx mixed-halide perovskite quantum dot blue light-emitting diodes
Source: Royal Society of Chemistry journal article supplement (doi:10.1039/d0tc05514j), 2021-01-01
Supplement: d0tc05514j1.pdf [file d0tc05514j1.pdf]

## Electronic Supplementary Information for

### Luminous Efficiency Roll-Off Mechanism in CsPbBr<sub>3-x</sub>Cl<sub>x</sub> Mixed-Halide Perovskite Quantum Dot Blue Light-Emitting Diodes

Young Ran Park,<sup>a</sup> Hong Hee Kim,<sup>b</sup> Sangwon Eom,<sup>c</sup> Won Kook Choi,<sup>b</sup> Hyosung Choi,<sup>c</sup> Bo Ram Lee,<sup>d</sup> and Youngjong Kang<sup>\*a,c</sup>

<sup>a</sup> Institute of Nano Science and Technology (INST), Hanyang University, Seongdong-gu, Seoul 04763, Korea

<sup>b</sup> Center for Opto-Electronic Materials and Devices, Korea Institute of Science and Technology (KIST), Seongbuk-gu, Seoul 02792, Korea

<sup>c</sup> Department of Chemistry, Hanyang University, Seongdong-gu, Seoul 04763, Korea

<sup>d</sup> Department of Physics, Pukyong National University, Busan 48513, Korea

\*Correspondence and requests for materials should be addressed to Y.K. (E-mail: youngjkang@hanyang.ac.kr)

#### **This file includes:**

Supplementary Figures 1–9;

Supplementary table S1;

Supplementary Descriptions;

Supplementary References

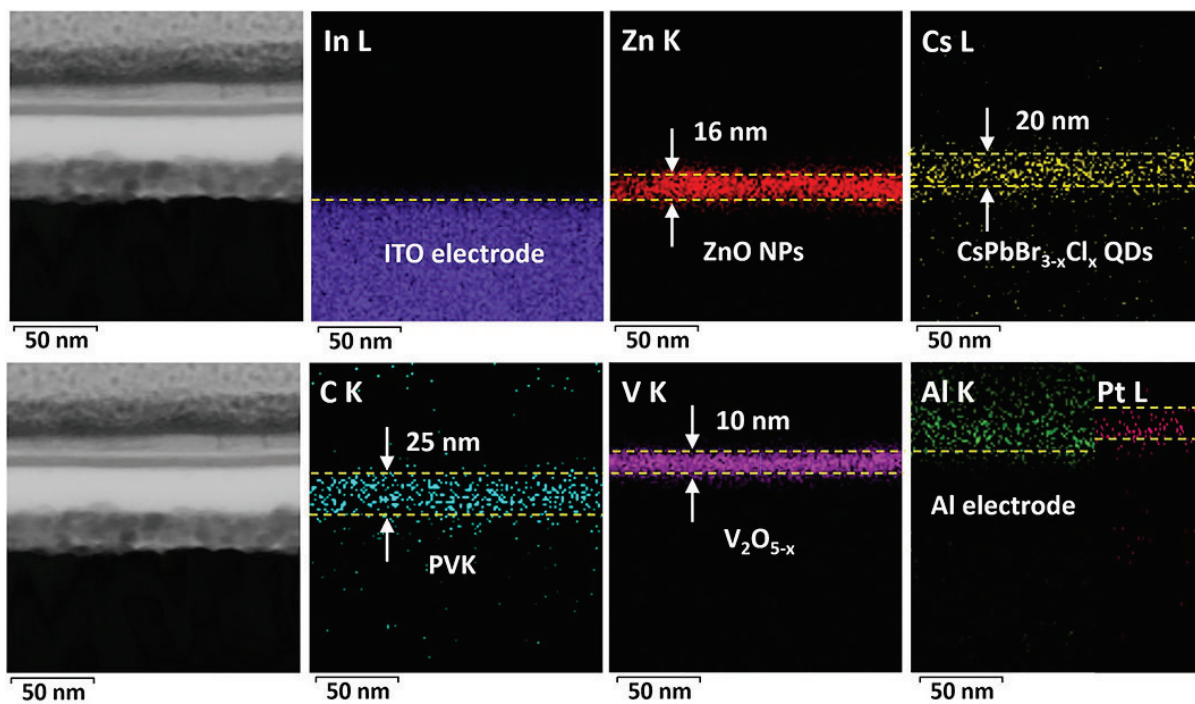

**Fig. S1.** Cross-sectional TEM (leftmost) and the corresponding EDX mapping images for elements of In, Zn, Cs, C, V, and Al (from left to right).

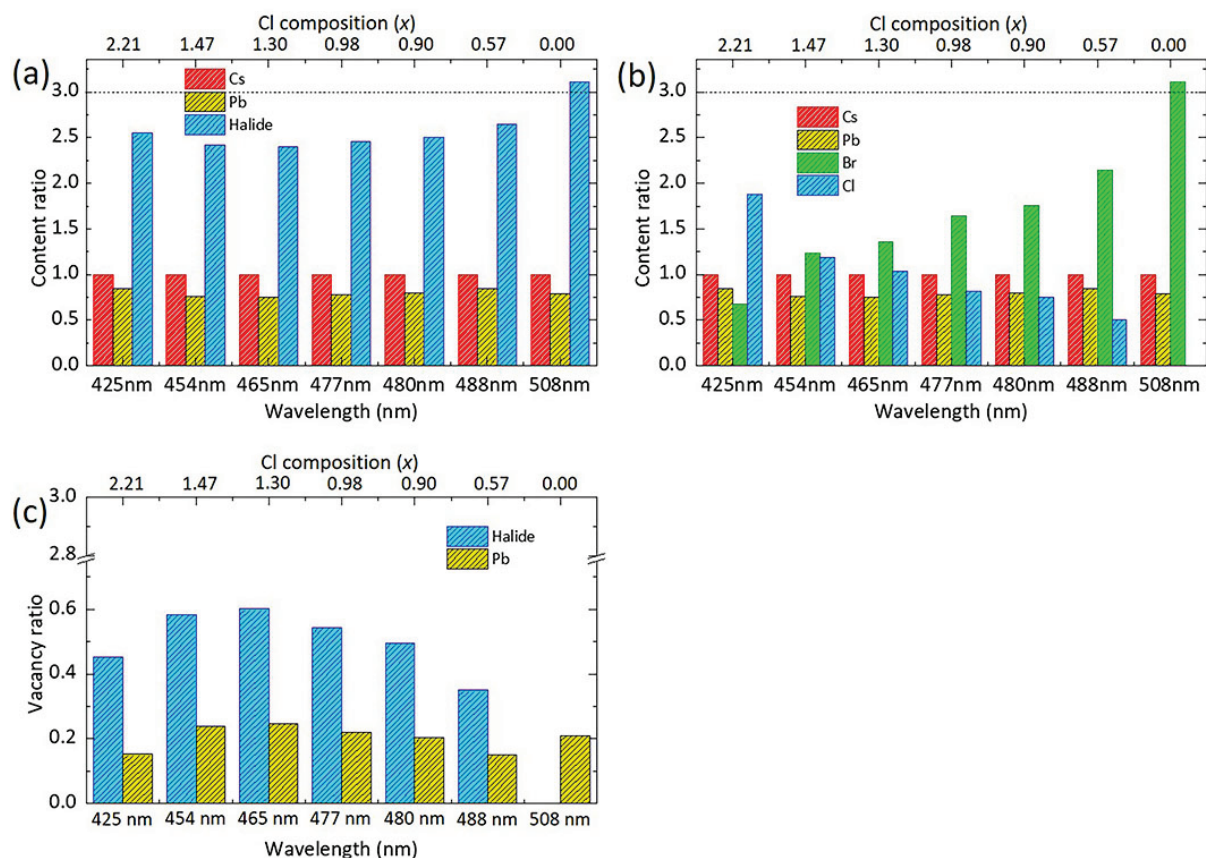

**Fig. S2.** (a-b) Elemental ratio and (c) halide ( $V_{\text{halide}}$ ) and Pb vacancy ( $V_{\text{Pb}}$ ) in CsPbBr<sub>3-x</sub>Cl<sub>x</sub> QDs determined by XPS (Fig. S5) and STEM-EDX (Fig. S6). (a) The changes of Cs, Pb, and halide, ratio, and (b) Cs, Pb, Br, and Cl with varying the Cl composition ( $0 \leq x \leq 2.21$ ). (c) The changes of halide ( $V_{\text{halide}}$ ) and Pb vacancy ( $V_{\text{Pb}}$ ) ratio in CsPbBr<sub>3-x</sub>Cl<sub>x</sub> QDs as a function of the Cl composition ( $0 \leq x \leq 2.21$ ).

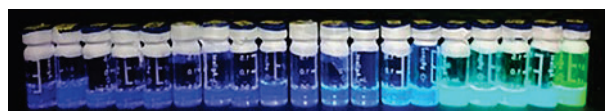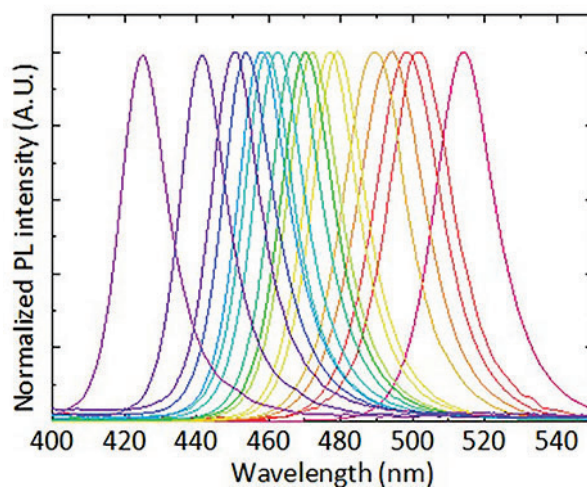

**Fig. S3.** The photograph of the colloidal solutions of CsPbBr<sub>3-x</sub>Cl<sub>x</sub> QDs under UV-light excitation,  $\lambda=365$  nm (upper panel). Representative PL spectra of CsPbBr<sub>3-x</sub>Cl<sub>x</sub> QDs (lower panel).

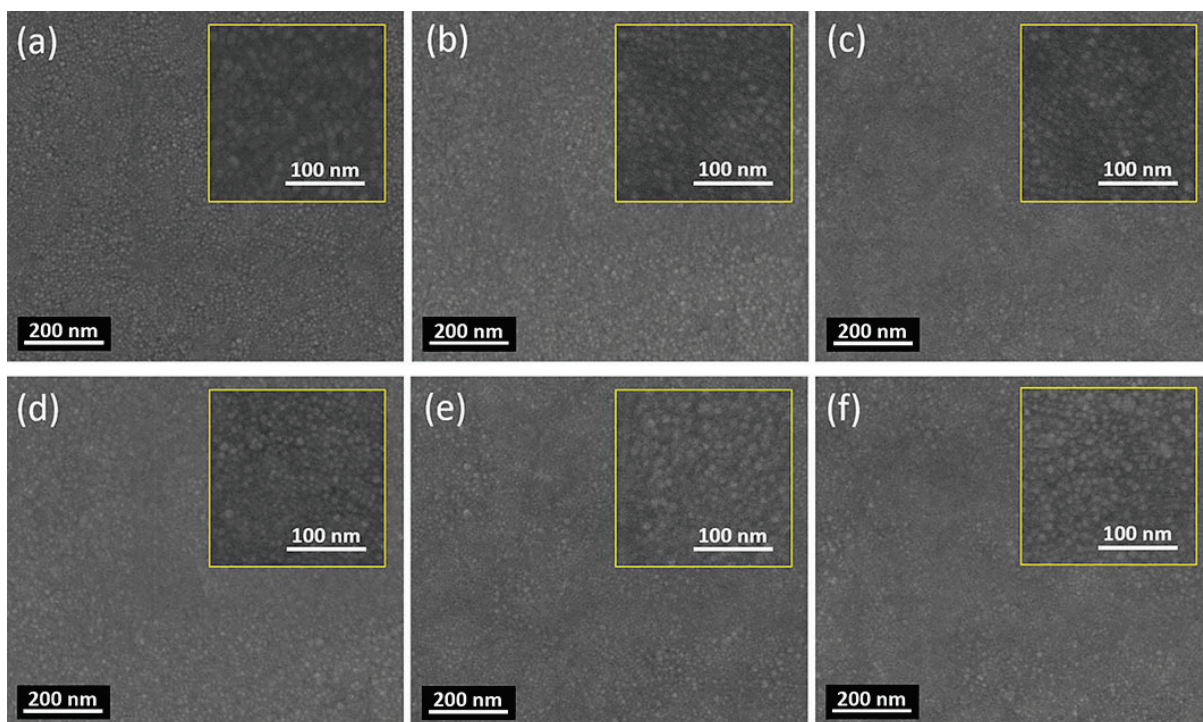

**Fig. S4.** Surface analyses of  $\text{CsPbBr}_{3-x}\text{Cl}_x$  QD films on *b*-PEI/ZnO/ITO obtained by FE-SEM. (a)  $x = 0.57$ , (b)  $x = 0.90$ , (c)  $x = 0.98$ , (d)  $x = 1.30$ , (e)  $x = 1.47$ , and (f)  $x = 2.21$ .

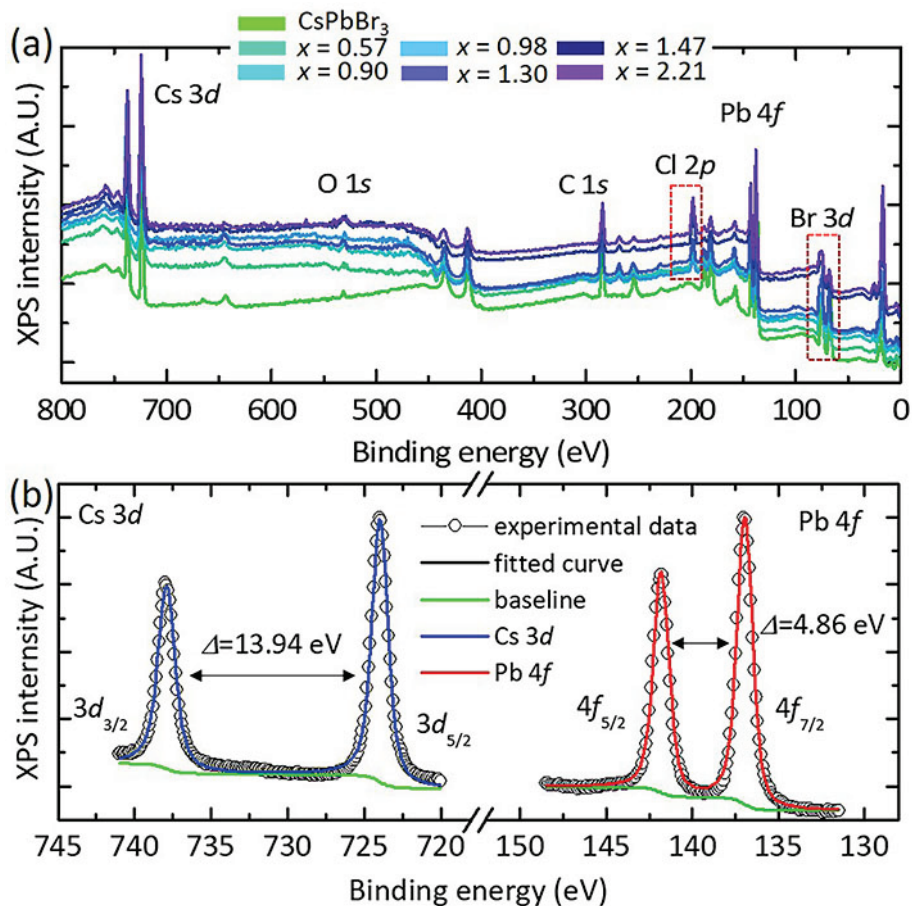

**Fig. S5.** XPS analyses of CsPbBr<sub>3-x</sub>Cl<sub>x</sub> QDs. (a) XPS survey spectra showing Br 3d, Pb 4f, Cl 2p, C 1s, N 1s, O 1s, and Cs 3d. (b) High-resolution XPS data for Cs 3d and Pb 4f. No metallic Pb<sup>0</sup> peak was observed.



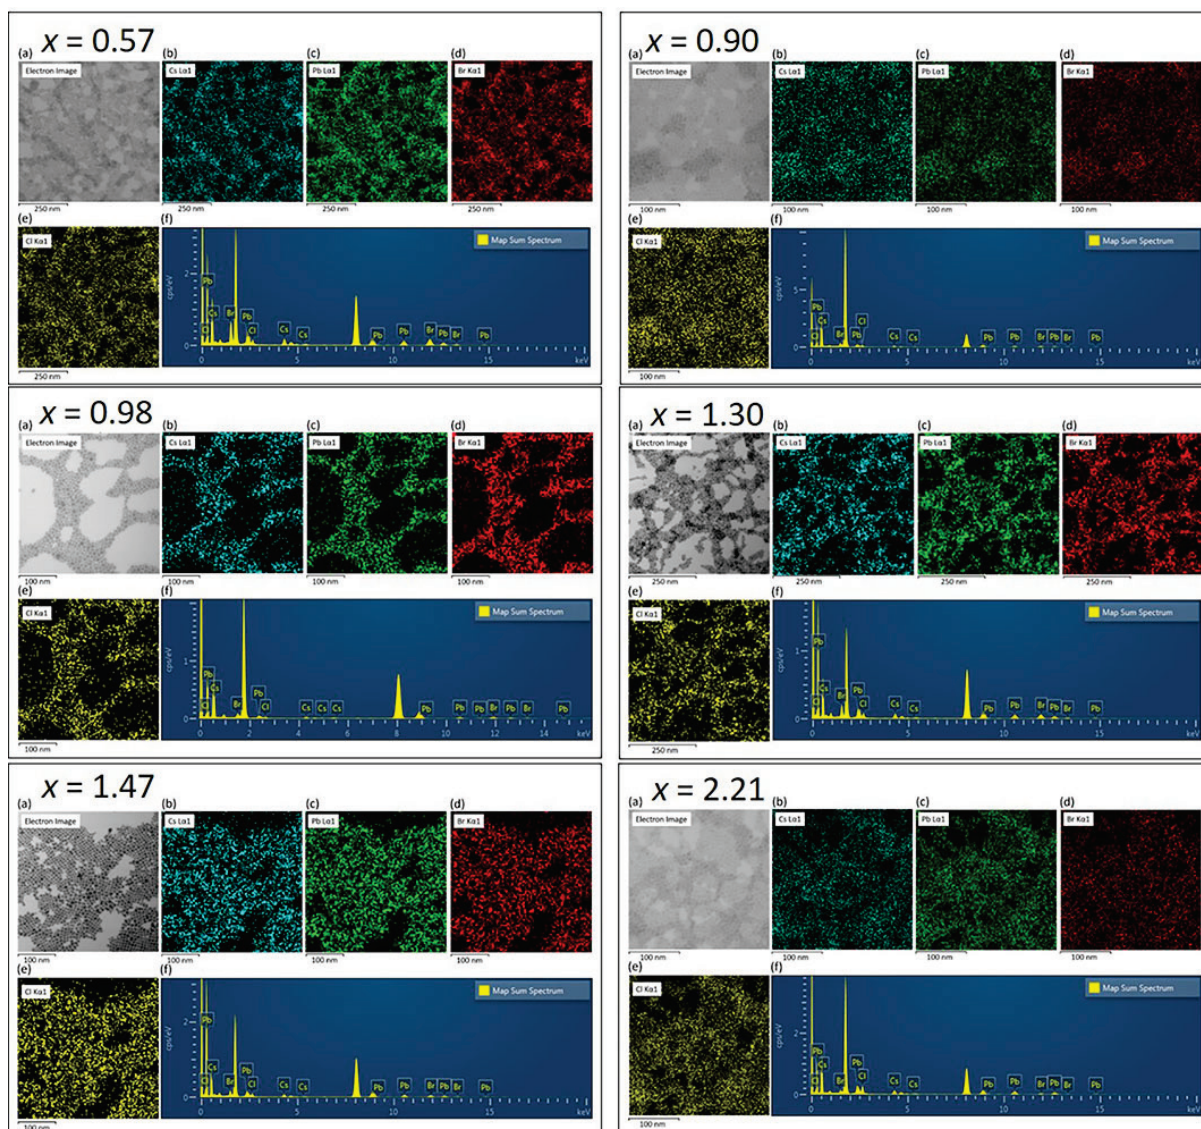

**Fig. S6.** STEM-EDX mapping of CsPbBr<sub>3-x</sub>Cl<sub>x</sub> QDs. (a) Bright-field STEM micrograph of CsPbBr<sub>3-x</sub>Cl<sub>x</sub> QDs. (b-e) The corresponding EDX mapping of CsPbBr<sub>3-x</sub>Cl<sub>x</sub> QDs: (b) Cs (cyan), (c) Pb (green), (d) Br (red), and (e) Cl (yellow). (f) STEM-EDX spectra of CsPbBr<sub>3-x</sub>Cl<sub>x</sub> QDs.

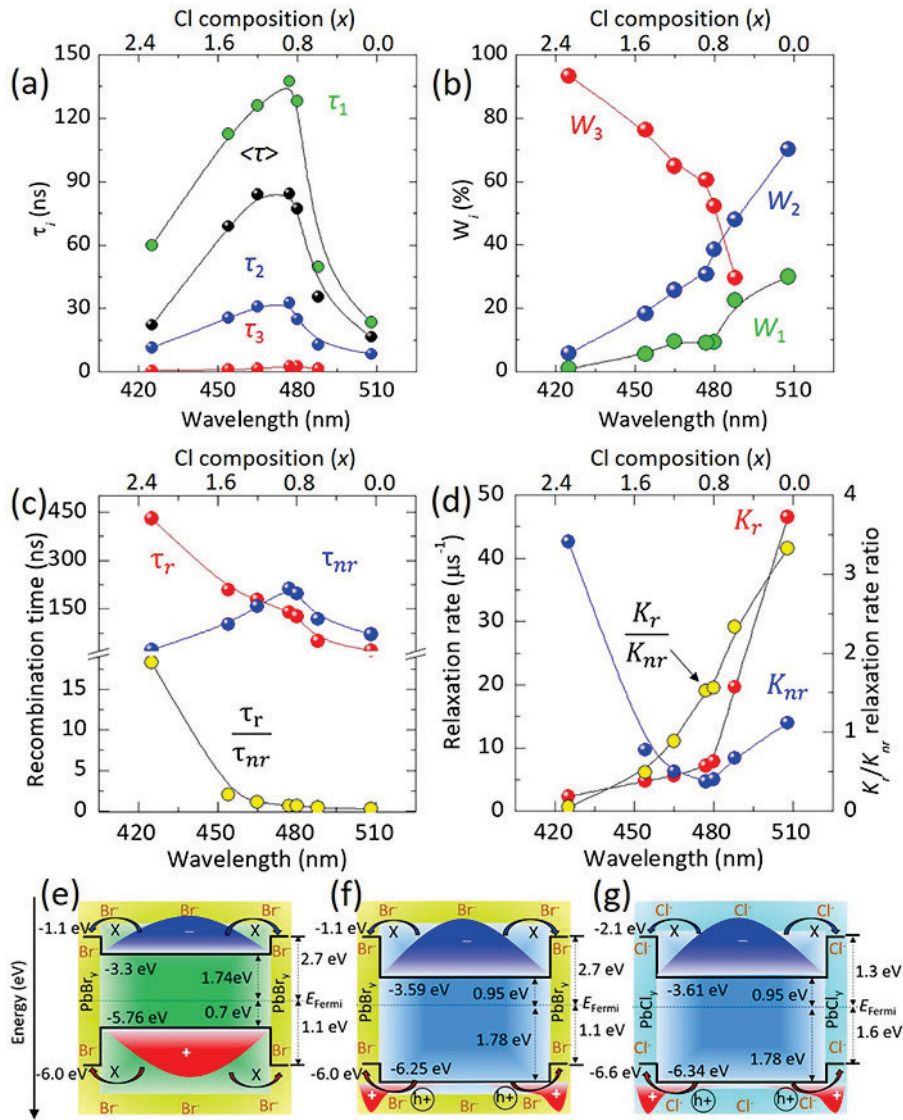

**Fig. S7.** Time-resolved PL spectra for CsPbBr<sub>3-x</sub>Cl<sub>x</sub> QDs. (a) decay time  $\tau_i$  and average tim  $\langle \tau \rangle$  and (b) amplitude  $W_i$  by using tri-exponential model fitting process. (c) Radiative ( $\tau_r$ ) recombination lifetime, nonradiative ( $\tau_{nr}$ ) recombination lifetime, and radiative ( $\tau_r$ )/nonradiative ( $\tau_{nr}$ ) recombination lifetime ratio and (d) radiative ( $K_r$ ) relaxation rate, nonradiative ( $K_{nr}$ ) relaxation rate, and radiative ( $K_r$ )/nonradiative ( $K_{nr}$ ) relaxation rate ratio for CsPbBr<sub>3-x</sub>Cl<sub>x</sub> QDs. Schematic diagram of the Br rich surface and assumed energy levels within the QDs. Energy level diagrams and charge wave functions of the proposed (e) type I core/shell (CsPbBr<sub>3</sub>/PbBr<sub>y</sub>), (f) inverse type II core/shell (CsPbBr<sub>3-x</sub>Cl<sub>x</sub>(type E)/PbBr<sub>y</sub>), and (g) inverse type II core/shell (CsPbBr<sub>3-x</sub>Cl<sub>x</sub>( $x = 1.47$ )/PbCl<sub>y</sub>).



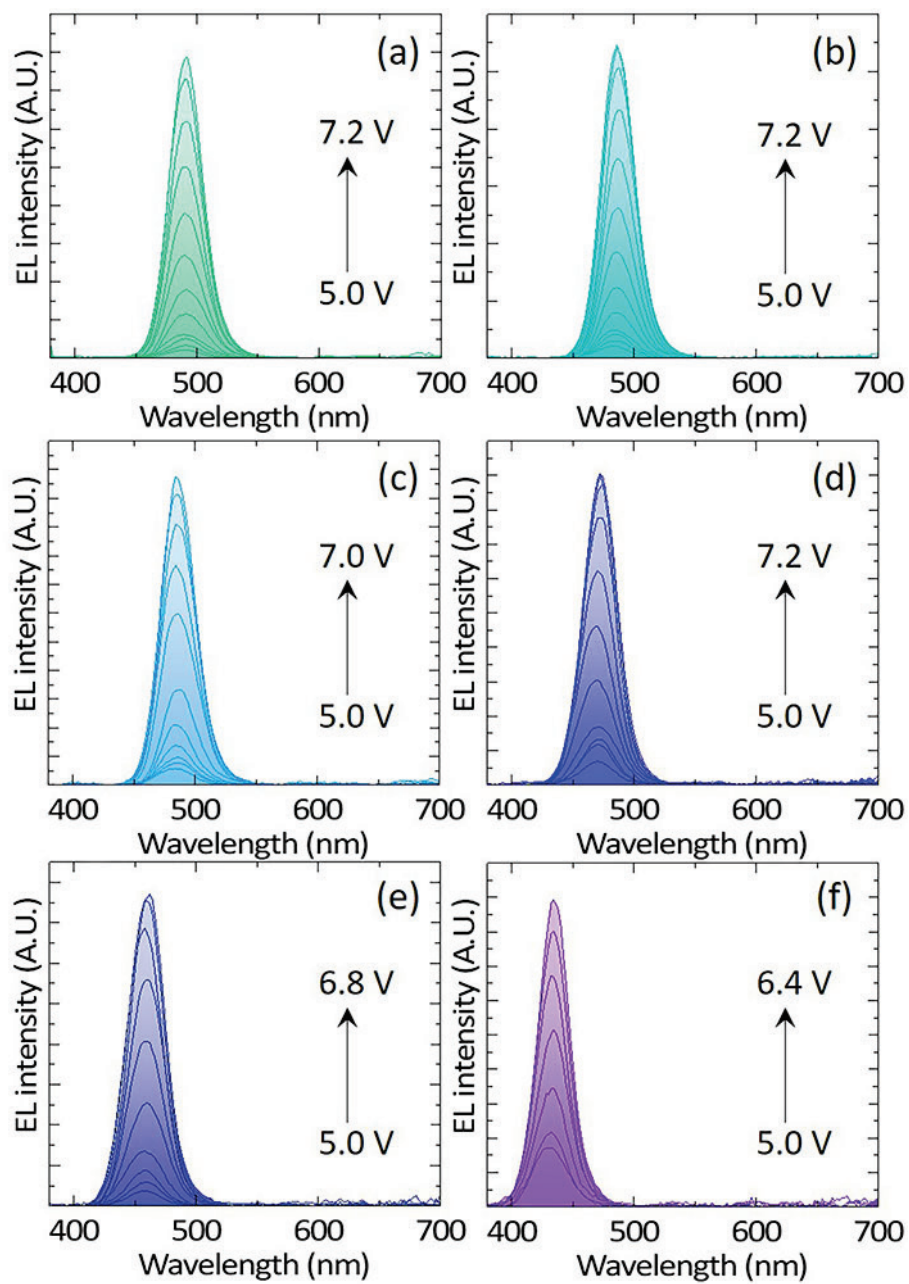

**Fig. S8.** EL spectra of CsPbBr<sub>3-x</sub>Cl<sub>x</sub> QD-LEDs at diverse applied voltages. (a)  $x = 0.57$ , (b)  $x = 0.90$ , (c)  $x = 0.98$ , (d)  $x = 1.30$ , (e)  $x = 1.47$ , and (f)  $x = 2.21$ .

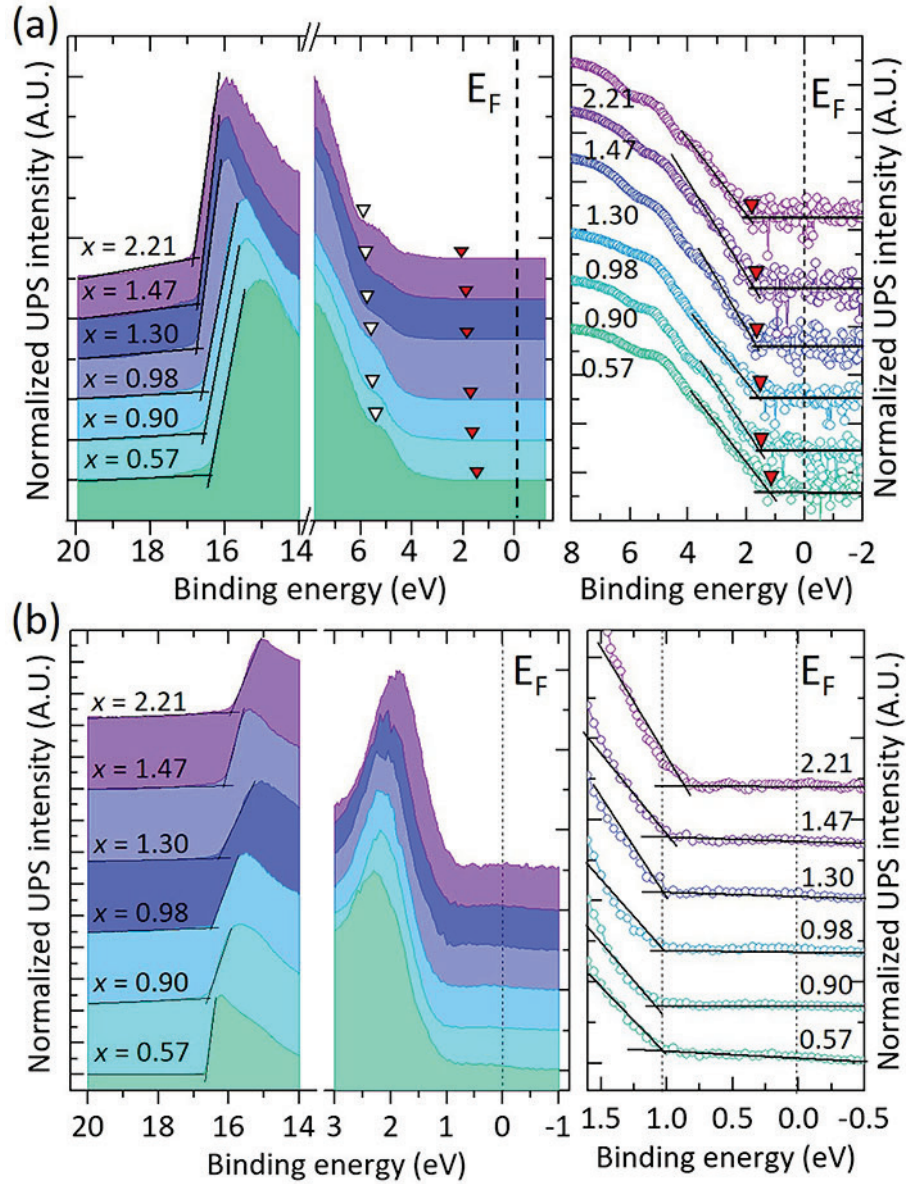

**Fig. S9.** UPS data of multilayer heterojunctions recorded (Left) in the low kinetic energy region (the secondary electron cutoff), and (right) in the low-binding-energy region (VBM region). (a) CsPbBr<sub>3-x</sub>Cl<sub>x</sub> on *b*-PEI/ZnO/ITO and (b) PVK on CsPbBr<sub>3-x</sub>Cl<sub>x</sub>/*b*-PEI/ZnO/ITO.

**Table S1.** Summary of the time-resolved PL decay profiles<sup>a</sup> of CsPbBr<sub>3-x</sub>Cl<sub>x</sub> QDs with varying the Cl composition (*x*)

| <i>x</i>                                       | 0.00 <sup>1</sup> | 0.57               | 0.90               | 0.98               | 1.30               | 1.47               | 2.21               |
|------------------------------------------------|-------------------|--------------------|--------------------|--------------------|--------------------|--------------------|--------------------|
| PL peak <sup>b</sup><br>(nm)                   | 508               | 488                | 480                | 477                | 465                | 454                | 425                |
| A                                              | 26.3 <sub>1</sub> | 6.7 <sub>8</sub>   | 12.4 <sub>3</sub>  | 16.1 <sub>1</sub>  | 18.4 <sub>5</sub>  | 11.4 <sub>7</sub>  | 4.6 <sub>3</sub>   |
| <i>W</i> <sub>1</sub> (%)                      | 70.0 <sub>9</sub> | 22.4 <sub>7</sub>  | 9.3 <sub>1</sub>   | 8.8 <sub>9</sub>   | 9.5 <sub>2</sub>   | 5.3 <sub>9</sub>   | 0.9 <sub>4</sub>   |
| <i>τ</i> <sub>1</sub> (ns)                     | 8.4 <sub>7</sub>  | 49.6 <sub>0</sub>  | 128.0 <sub>4</sub> | 137.4 <sub>5</sub> | 125.9 <sub>7</sub> | 112.6 <sub>2</sub> | 59.7 <sub>6</sub>  |
| <i>W</i> <sub>2</sub> (%)                      | 29.9 <sub>1</sub> | 47.9 <sub>5</sub>  | 38.5 <sub>5</sub>  | 30.6 <sub>7</sub>  | 25.6 <sub>6</sub>  | 18.3 <sub>0</sub>  | 5.7 <sub>9</sub>   |
| <i>τ</i> <sub>2</sub> (ns)                     | 23.3 <sub>7</sub> | 12.9 <sub>9</sub>  | 25.0 <sub>4</sub>  | 32.6 <sub>9</sub>  | 31.0 <sub>0</sub>  | 25.5 <sub>0</sub>  | 11.5 <sub>5</sub>  |
| <i>W</i> <sub>3</sub> (%)                      | -                 | 29.5 <sub>8</sub>  | 52.1 <sub>4</sub>  | 60.4 <sub>4</sub>  | 64.8 <sub>3</sub>  | 76.3 <sub>0</sub>  | 93.2 <sub>7</sub>  |
| <i>τ</i> <sub>3</sub> (ns)                     | -                 | 1.4 <sub>7</sub>   | 2.5 <sub>5</sub>   | 2.6 <sub>5</sub>   | 1.5 <sub>1</sub>   | 1.1 <sub>6</sub>   | 0.6 <sub>9</sub>   |
| <i>τ</i> <sub>avg</sub> (ns)                   | 16.5 <sub>3</sub> | 35.6 <sub>0</sub>  | 77.3 <sub>0</sub>  | 84.3 <sub>6</sub>  | 84.0 <sub>4</sub>  | 68.9 <sub>1</sub>  | 22.2 <sub>6</sub>  |
| <i>τ</i> <sub>r</sub> (ns)                     | 21.5 <sub>1</sub> | 50.8 <sub>6</sub>  | 126.8 <sub>9</sub> | 139.7 <sub>4</sub> | 179.1 <sub>0</sub> | 208.2 <sub>9</sub> | 429.7 <sub>6</sub> |
| <i>τ</i> <sub>nr</sub> (ns)                    | 71.4 <sub>3</sub> | 118.6 <sub>7</sub> | 197.8 <sub>0</sub> | 212.8 <sub>7</sub> | 158.3 <sub>4</sub> | 102.9 <sub>8</sub> | 23.4 <sub>8</sub>  |
| <i>τ</i> <sub>r</sub> / <i>τ</i> <sub>nr</sub> | 0.3 <sub>0</sub>  | 0.4 <sub>3</sub>   | 0.6 <sub>4</sub>   | 0.6 <sub>6</sub>   | 1.1 <sub>3</sub>   | 2.0 <sub>2</sub>   | 18.3 <sub>1</sub>  |
| <i>K</i> <sub>r</sub> (μs <sup>-1</sup> )      | 46.5 <sub>0</sub> | 19.6 <sub>6</sub>  | 7.8 <sub>8</sub>   | 7.1 <sub>6</sub>   | 5.5 <sub>8</sub>   | 4.8 <sub>0</sub>   | 2.3 <sub>3</sub>   |
| <i>K</i> <sub>nr</sub> (μs <sup>-1</sup> )     | 14.0 <sub>0</sub> | 8.4 <sub>3</sub>   | 5.05 <sub>6</sub>  | 4.7 <sub>0</sub>   | 6.3 <sub>2</sub>   | 9.7 <sub>1</sub>   | 42.5 <sub>9</sub>  |
| <i>K</i> <sub>r</sub> / <i>K</i> <sub>nr</sub> | 3.3 <sub>2</sub>  | 2.3 <sub>3</sub>   | 1.5 <sub>6</sub>   | 1.5 <sub>2</sub>   | 0.8 <sub>8</sub>   | 0.4 <sub>3</sub>   | 0.0 <sub>5</sub>   |

<sup>a</sup> The PL decay curves were numerically analyzed using a tri-exponential model fitting expressed by

$$I(t) = A + W_1 e^{-\frac{t}{\tau_1}} + W_2 e^{-\frac{t}{\tau_2}} + W_3 e^{-\frac{t}{\tau_3}},$$

where *I*, *t*, *W*, and *τ* is normalized emission intensity, time after excitation, amplitude coefficient, and decay time constant, respectively.

<sup>b</sup> In a solution

## Supplementary References

1. Y. R. Park, S. Eom, H. H. Kim, W. K. Choi and Y. Kang, *Sci Rep*, 2020, **10**, 14758.
